# Supplementary material
Source: PubMed Central journal article supplement (PMC4793484)

Appendix. Flow chart of participants.

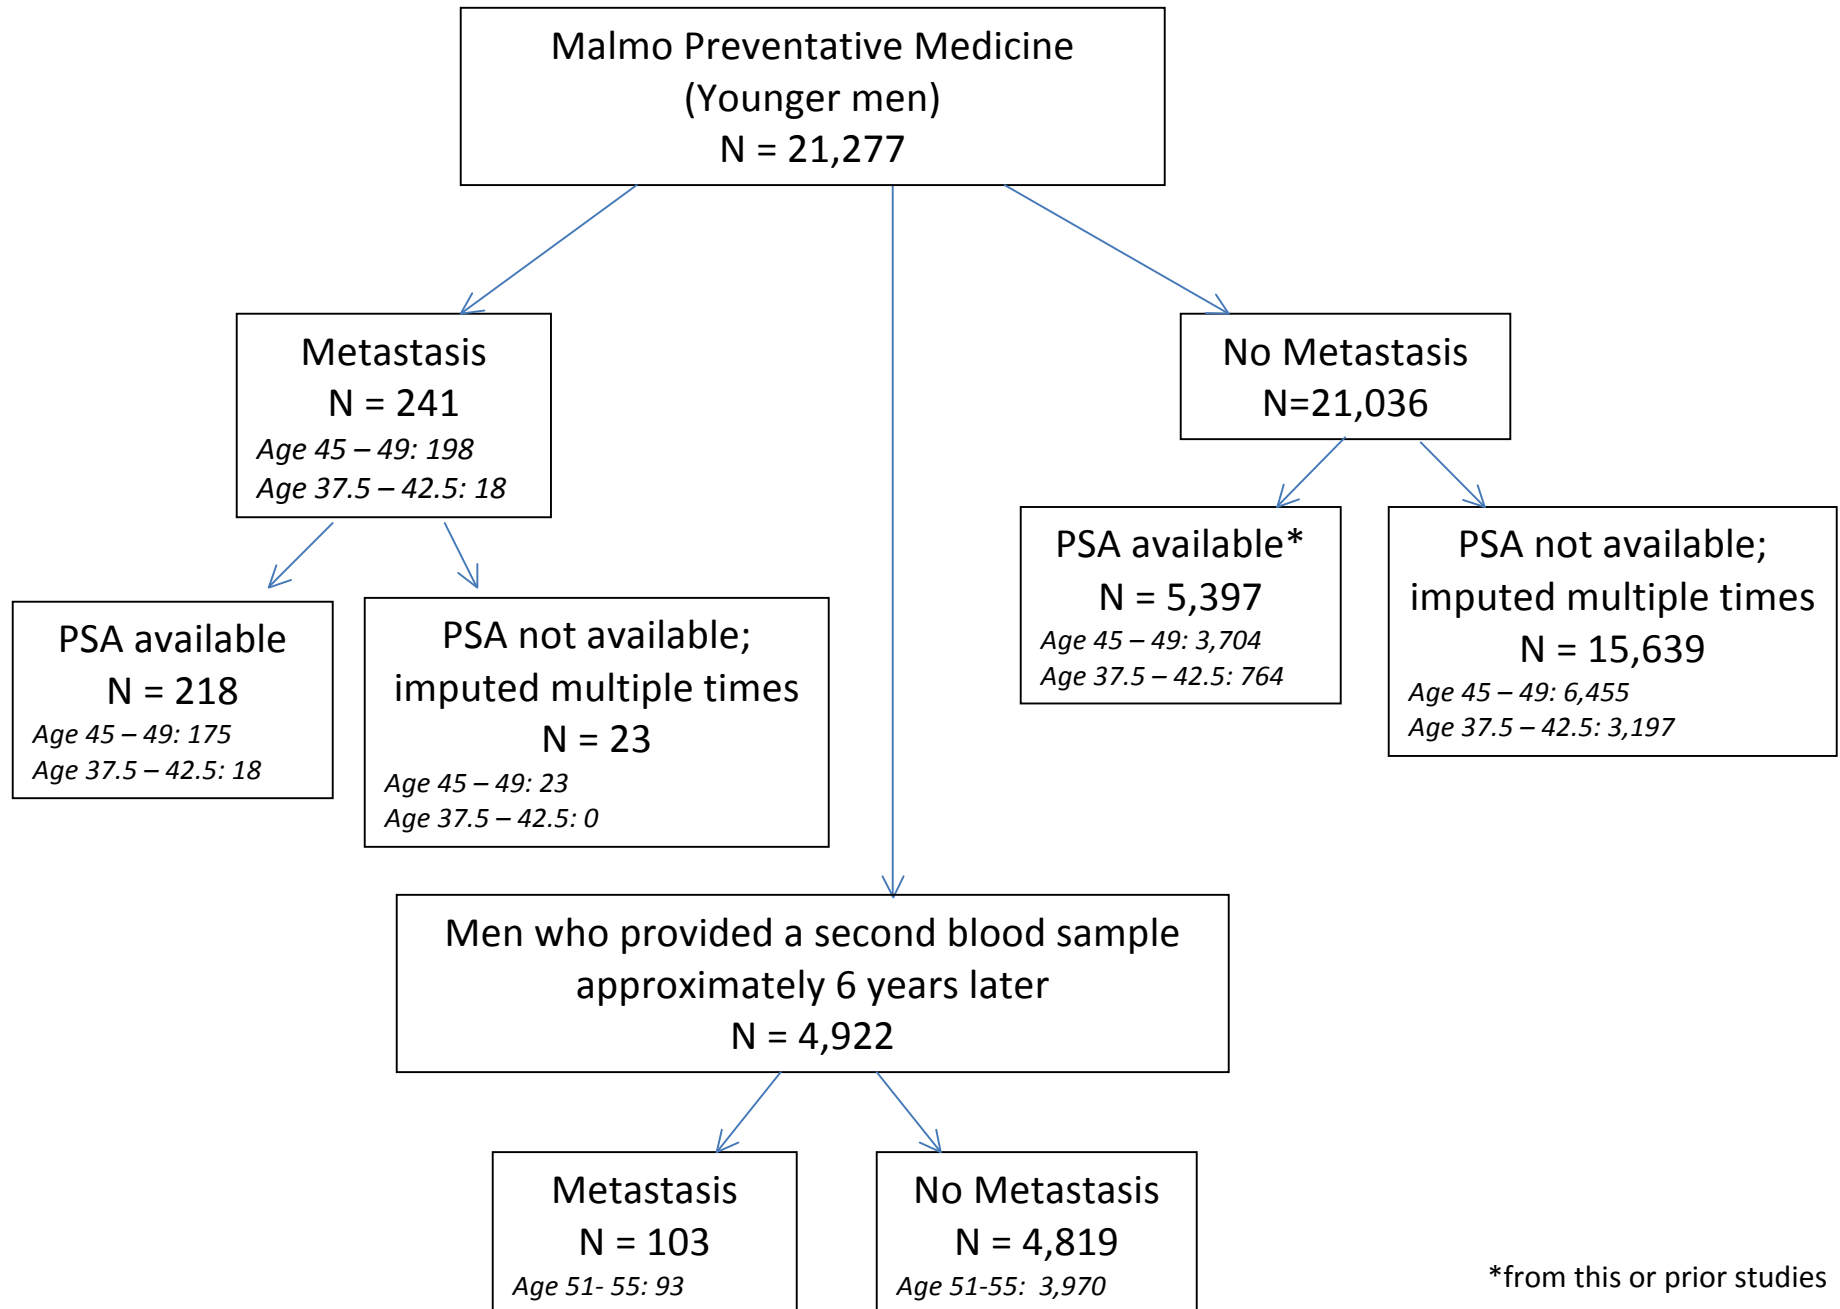

\*from this or prior studies

Supplement: vica005641.ww1_default.pdf [file vica005641.ww1_default.pdf]
